# Supplementary material
Source: MDPI journal article supplement (https://www.mdpi.com/1999-4907/14/3/470)
Supplement: s1 [file s1]

Article

# Soil Microbial Biomass and Community Composition across a Chronosequence of Chinese Cedar Plantations

Ya Shen <sup>†</sup>, Shichen Xiong <sup>†</sup>, Chengming You, Li Zhang, Yu Li, Zongwen Hong, Yifan Hu, Jing Li, Han Li, Lixia Wang, Sining Liu, Bo Tan and Zhenfeng Xu <sup>\*</sup>

National Forestry and Grassland Administration Key Laboratory of Forest Resources Conservation and Ecological Safety on the Upper Reaches of the Yangtze River, Forestry Ecological Engineering in the Upper Reaches of the Yangtze River Key Laboratory of Sichuan Province, Institute of Ecology and Forestry, Sichuan Agricultural University, Chengdu 611130, China

<sup>\*</sup> Correspondence: xuzf@sicau.edu.cn

<sup>†</sup> These authors contributed equally to this work.

**Table S1.** Selected basic climate data information of the study area in the last three years (2019–2021).

| Climate data                      | 2019   | 2020       | 2021   |
|-----------------------------------|--------|------------|--------|
| Annual precipitation (mm)         | 1812.6 | 1609.6     | 1458.1 |
| Average annual precipitation (mm) |        | 1627 ± 102 |        |
| Average annual temperature (°C)   | 16.8   | 17.1       | 17.2   |
| Annual mean relative humidity (%) | 81     | 79         | 81     |
| Annual sunshine hours (hour)      | 893.5  | 2054.2     | 1486.4 |

**Table S2.** The basic information on *Cryptomeria japonica* var. *sinensis* plantations in different stand ages is from the survey conducted in August 2020.

| Age group          | Altitude (m) | Latitude (N) | Longitude (E) | Slope (°) | Canopy density (%) | Mean height of the trees (m) | Mean diameter at breast height (cm) |
|--------------------|--------------|--------------|---------------|-----------|--------------------|------------------------------|-------------------------------------|
| Young forest       | 1301         | 29°47'36"    | 103°10'04"    | 20        | 20                 | 6.4±0.4e                     | 8.04±0.48e                          |
| Middle-aged forest | 1158         | 29°45'26"    | 103°11'25"    | 16        | 60                 | 12.1±0.2d                    | 16.20±0.61d                         |
| Near-mature forest | 1239         | 29°47'44"    | 103°10'26"    | 25        | 70                 | 17.0±0.6c                    | 22.01±0.89c                         |
| Mature forest      | 1248         | 29°47'35"    | 103°10'31"    | 28        | 60                 | 20.2±0.3b                    | 30.30±0.84b                         |
| Over-mature forest | 1160         | 29°44'08"    | 103°11'49"    | 20        | 90                 | 25.2±0.6a                    | 47.64±1.80a                         |

Different lowercase letters indicate significant differences among different stand ages ( $p < 0.05$ ).

**Table S3.** Soil physicochemical properties for each stand age in July 2021.

| Stand age                            | Soil depth | GWC<br>(kg kg <sup>-1</sup> ) | SBD<br>g cm <sup>-3</sup> | pH               | NH <sub>4</sub> <sup>+</sup> -N<br>(mg kg <sup>-1</sup> ) | NO <sub>3</sub> <sup>-</sup> -N<br>(mg kg <sup>-1</sup> ) | SOC<br>(g kg <sup>-1</sup> ) | TN<br>(g kg <sup>-1</sup> ) | TP<br>(g kg <sup>-1</sup> ) | C/N                     | C/P              | N/P              |
|--------------------------------------|------------|-------------------------------|---------------------------|------------------|-----------------------------------------------------------|-----------------------------------------------------------|------------------------------|-----------------------------|-----------------------------|-------------------------|------------------|------------------|
| Young forest<br>(7 years old)        | 0–15 cm    | 0.39±0.01c                    | 1.12±0.07a*               | 4.65±0.01a*      | 2.79±0.17cd                                               | 2.42±0.22b                                                | 6.92±0.40d                   | 0.78±0.06c                  | 0.36±0.02c                  | 7.80±0.07d              | 19.41±1.92d      | 2.24±0.00d       |
|                                      | 15–30 cm   | 0.40±0.01c                    | 1.10±0.14a                | 4.85±0.03a       | 2.39±0.33c                                                | 2.15±0.14b                                                | 7.09±0.11c                   | 0.44±0.02c                  | 0.32±0.03c                  | 15.83±0.78b             | 22.19±1.58d      | 1.49±0.02c       |
| Middle-aged forest<br>(13 years old) | 0–15 cm    | 0.81±0.01b*                   | 0.92±0.00a*               | 4.30±0.04b*      | 1.27±0.06d*                                               | 23.74±1.24a*                                              | 55.72±2.75c*                 | 1.59±0.11bc                 | 0.55±0.03b                  | 37.19±3.38ab*           | 101.51±3.11c*    | 2.85±0.34d       |
|                                      | 15–30 cm   | 0.62±0.08b                    | 1.02±0.04a                | 4.62±0.02b       | 4.14±0.60b                                                | 13.40±0.70a                                               | 29.47±0.56b                  | 1.52±0.18b                  | 0.58±0.01b                  | 20.01±2.52b             | 50.85±1.47c      | 2.35±0.09bc      |
| Near-mature forest<br>(24 years old) | 0–15 cm    | 1.27±0.00a*                   | 0.45±0.08b*               | 4.05±0.05c*      | 13.22±0.56a*                                              | 27.27±2.46a*                                              | 91.24±0.20a*                 | 3.84±0.62a*                 | 0.58±0.03b                  | 28.39±2.27bc*           | 158.43±9.22a*    | 7.47±0.18a*      |
|                                      | 15–30 cm   | 0.81±0.07b                    | 0.64±0.00b                | 4.39±0.04c       | 8.61±0.10a                                                | 14.66±1.08a                                               | 75.08±4.68a                  | 1.58±0.28b                  | 0.52±0.02b                  | 43.13±1.55a             | 131.55±3.17a     | 2.47±0.16bc      |
| Mature forest<br>(33 years old)      | 0–15 cm    | 1.27±0.03a*                   | 0.48±0.04b*               | 4.06±0.04c*      | 10.77±0.80b*                                              | 23.16±2.76a*                                              | 89.18±0.30a*                 | 3.99±0.31a*                 | 0.65±0.03a                  | 22.64±1.71c             | 135.60±5.64b*    | 6.14±0.21b*      |
|                                      | 15–30 cm   | 1.00±0.00a                    | 0.56±0.02b                | 4.53±0.03bc      | 8.86±0.35a                                                | 12.54±1.19a                                               | 65.33±4.81a                  | 2.72±0.22a                  | 0.72±0.00a                  | 24.09±1.02b             | 97.11±2.83b      | 4.12±0.04a       |
| Over-mature forest<br>(53 years old) | 0–15 cm    | 0.76±0.07b*                   | 0.96±0.06a*               | 4.19±0.07bc*     | 3.37±0.09c                                                | 28.17±3.11a*                                              | 70.70±1.01b*                 | 2.06±0.48b                  | 0.54±0.07b                  | 40.68±9.07a*            | 150.74±6.21ab*   | 4.24±0.79c*      |
|                                      | 15–30 cm   | 0.40±0.02c                    | 1.06±0.01a                | 4.44±0.01c       | 4.10±0.03b                                                | 11.07±0.73a                                               | 33.82±1.54b                  | 1.49±0.02b                  | 0.49±0.03b                  | 21.96±0.94b             | 69.60±3.43c      | 3.21±0.01ab      |
| Stand age (SA)                       |            | <i>p</i> < 0.001              | <i>p</i> < 0.001          | <i>p</i> < 0.001 | <i>p</i> < 0.001                                          | <i>p</i> < 0.001                                          | <i>p</i> < 0.001             | <i>p</i> < 0.001            | <i>p</i> < 0.001            | <i>p</i> < 0.001        | <i>p</i> < 0.001 | <i>p</i> < 0.001 |
| Soil depth (SD)                      |            | <i>p</i> < 0.001              | <i>p</i> < 0.05           | <i>p</i> < 0.001 | <i>p</i> < 0.05                                           | <i>p</i> < 0.001                                          | <i>p</i> < 0.001             | <i>p</i> < 0.001            | <b><i>p</i> = 0.643</b>     | <b><i>p</i> = 0.285</b> | <i>p</i> < 0.001 | <i>p</i> < 0.001 |
| SA×SD                                |            | <i>p</i> < 0.001              | <b><i>p</i> = 0.599</b>   | <i>p</i> < 0.05  | <i>p</i> < 0.001                                          | <i>p</i> < 0.01                                           | <i>p</i> < 0.001             | <i>p</i> < 0.05             | <b><i>p</i> = 0.247</b>     | <i>p</i> < 0.001        | <i>p</i> < 0.001 | <i>p</i> < 0.001 |

Different lowercase letters denote statistically significant differences in the main effect between stand ages or significant differences between stand ages in the same soil depth (*p* < 0.05). The asterisk denotes significant differences between two soil depths of the same stand age or statistically significant differences in the main effect between the two soil depths. Results of two-way ANOVA for the main factors (stand age and soil depth) and their interactions (SA × SD) are shown in Table S2. Bonferroni was used for comparison of main effects or post-hoc tests of simple effects. Values are means ± standard errors (SE) for the sampling plots (*n* = 3). GWC, SBD, NH<sub>4</sub><sup>+</sup>-N, and NO<sub>3</sub><sup>-</sup>-N, SOC, TN, TP, C/N, C/P, and N/P refer to gravimetric water content, soil bulk density, ammonium nitrogen and nitrate nitrogen, soil organic carbon, total nitrogen, total phosphorus, the ratio of soil organic carbon to total nitrogen or total phosphorus, and the ratio of total nitrogen to total phosphorus, respectively.

**Table S4.** P value and F value based on a two-way ANOVA for the proportion of functional groups.

|                   | Stand age (SA) <sup>a</sup> | Soil depth (SD) | SA × SD      |
|-------------------|-----------------------------|-----------------|--------------|
| GP/Total PLFAs    | <sup>b</sup> 24.13(0.00)*** | 87.40(0.00)***  | 3.66(0.02)*  |
| GN/Total PLFAs    | 5.40(0.00)**                | 33.82(0.00)***  | 3.58(0.02)*  |
| F/Total PLFAs     | 35.07(0.00)***              | 1.17(0.29)ns    | 4.23(0.01)*  |
| AMF/Total PLFAs   | 11.89(0.00)***              | 7.24(0.01)*     | 0.83(0.53)ns |
| ACT/Total PLFAs   | 4.01(0.02)**                | 4.25(0.05)ns    | 1.47(0.25)ns |
| Other/Total PLFAs | 15.00(0.00)***              | 46.99(0.00)***  | 2.00(0.13)ns |

<sup>a</sup> Degrees of freedom: *df* = 1 for soil depth, *df* = 4 for stand age and SA × SD interaction.

<sup>b</sup> F-value and P-values (in parentheses) of two-way ANOVA were given. \*, *p* < 0.05, \*\*, *p* < 0.01, \*\*\*, *p* < 0.001, and ns, not significant.

Abbreviations: sum of 16:0 and 18:0 (Other), actinomycetes (ACT), Arbuscular mycorrhizal fungi (AMF), Gram-negative bacteria (GN), and Gram-positive bacteria (GP).

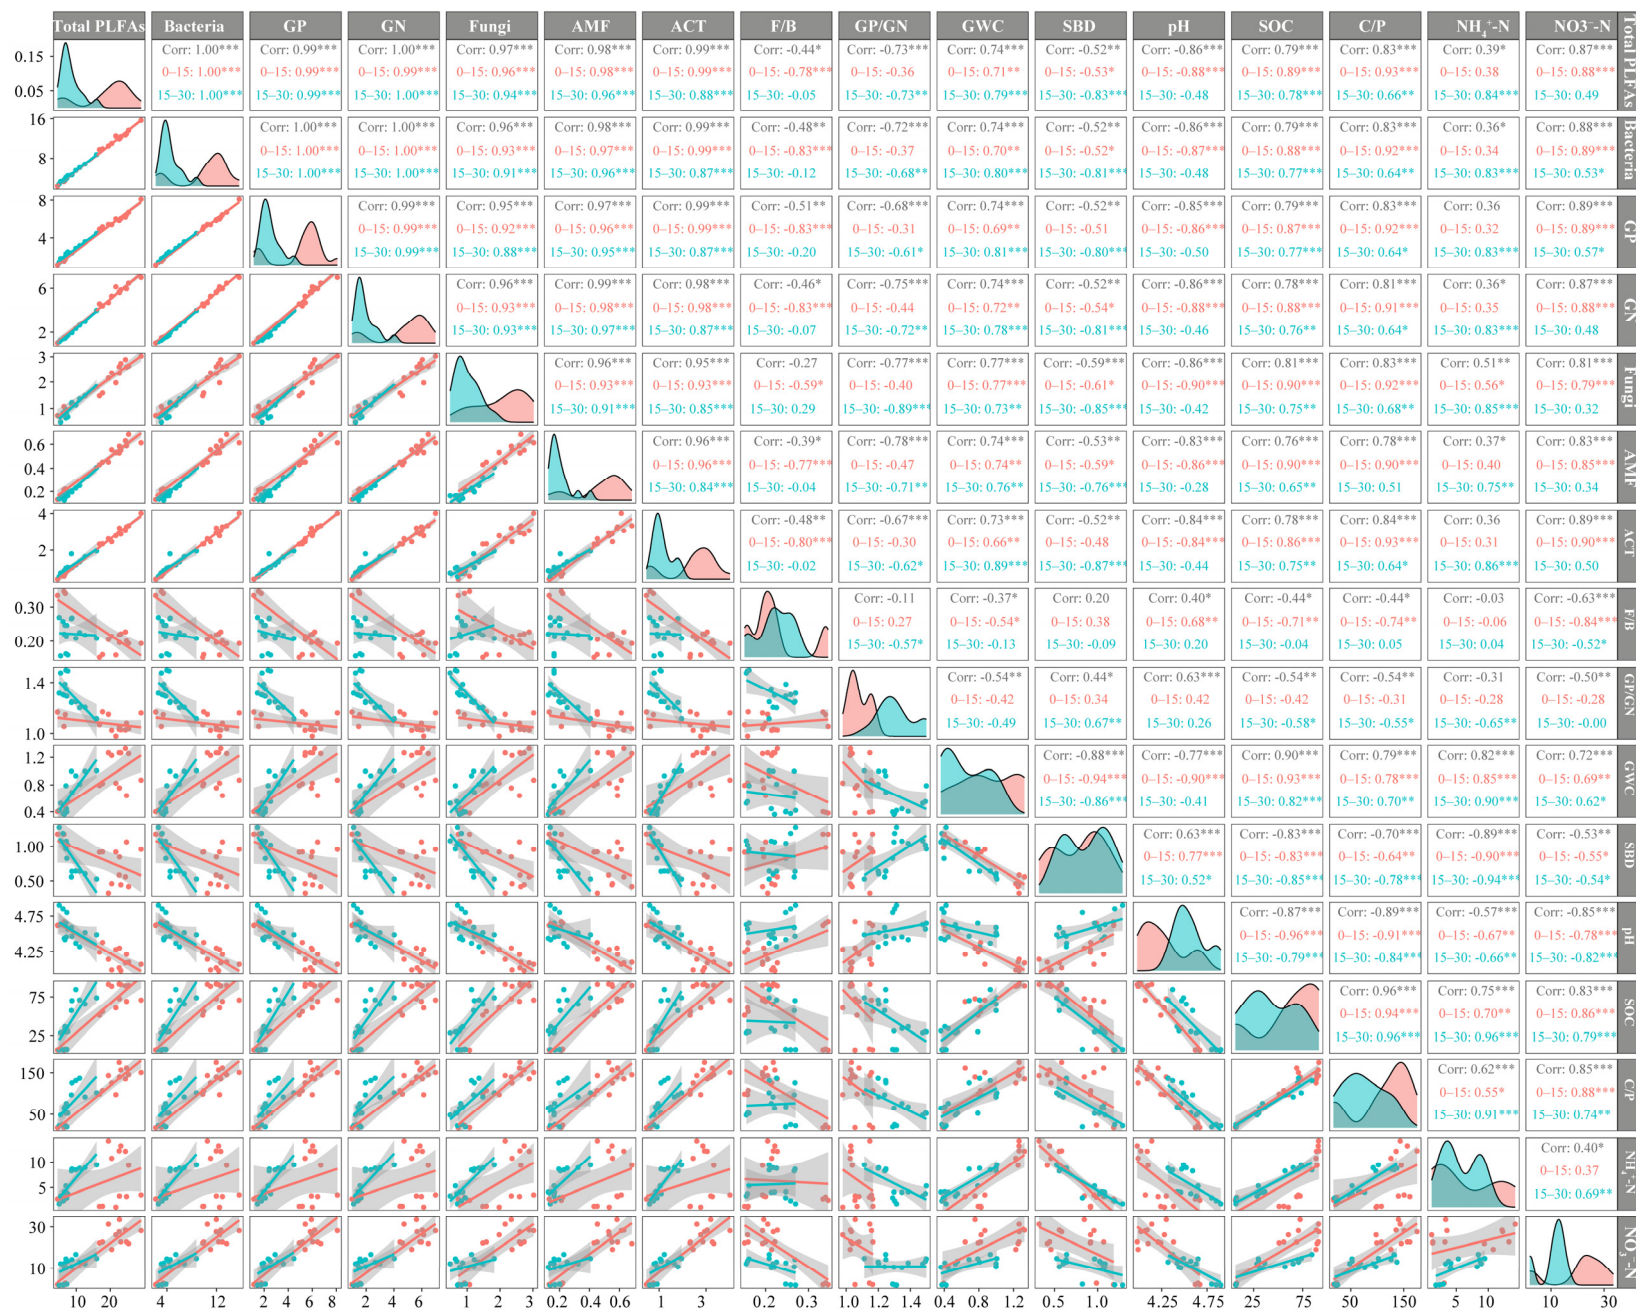

**Figure S1.** Correlation analysis of the soil microbial biomass and composition with selected soil physicochemical properties. The upper right part is Pearson's correlation coefficient between PLFAs and soil physicochemical properties ("corr" indicates regardless of soil depth, red and cyan represent 0–15 cm soil depth and 15–30 cm soil depth, respectively, and \*  $p < 0.05$ , \*\*  $p < 0.01$ , \*\*\*  $p < 0.001$ ). The diagonal position shows the intensity distribution of each indicator at 0–15 cm soil depth (red) and 15–30 cm soil depth (cyan). The lower left part is the scatter plot among indicators of different soil depths (solid straight red and solid straight cyan trend lines represent linear regression of 0–15 cm soil depth and 15–30 cm soil depth, respectively). Abbreviations: Gram-positive bacteria (GP), Gram-negative bacteria (GN), arbuscular mycorrhizal fungi (AMF), actinomycetes (ACT), gravimetric water content (GWC), soil bulk density (SBD), soil organic carbon (SOC), ammonium nitrogen ( $\text{NH}_4^+\text{-N}$ ), nitrate nitrogen ( $\text{NO}_3^-\text{-N}$ ). GP/GN, F/B, and C/P represent the ratios of Gram-positive bacteria to Gram-negative bacteria, fungi to bacteria, and organic carbon to total phosphorus, respectively.
